# Supplementary material for: Advantages of fully automated AI-enhanced algorithm (5D CNS+™) for generating a fetal neurosonogram in clinical routine
Source: publisher site journal article supplement (doi:10.1515/jpm-2025-0188), 2025-09-15
Supplement: Supplementary file 1 [file j_jpm-2025-0188_suppl_001.docx]

**Supplementary Material**

Video-Clip S1: Screen video of the application of both software versions of 5D CNS+™ – semi-automatic (left screen) and fully automatic (right screen) – depicted side-by-side: essential steps illustrated in Figure 1 and the passed time are displayed.
